# Supplementary material for: Identification of the Mutational Landscape of Gynecological Malignancies
Source: PubMed Central journal article supplement (PMC7330690; doi:10.7150/jca.46174), 2020-06-08
Supplement: jcav11p4870s1.pdf [file jcav11p4870s1.pdf]

## **Supplementary Figure legend**

**Supplementary Figure S1. Effect of TTN, PTEN and ARID1A expression on Overall survival of patients with gynecological malignancies using TCGA dataset from cBioportal and Kaplan-Meier (KM) plotter respectively.**

(A) The effect of TTN expression on the overall survival in months of patients with ovarian/fallopian tube cancer, cervical cancer, and uterine cancer in the TCGA dataset from cBioportal. (B) The effect of downregulated regulated genes (PTEN and ARID1A) on overall survival (OS) of patients with ovarian cancer as measured by KM plotter. (C) Analysis of TCGA dataset from cBioportal for different kinds of gynecological malignancies to identify the genes that either carry driver mutations or random mutations/mutation with unknown significance.

A

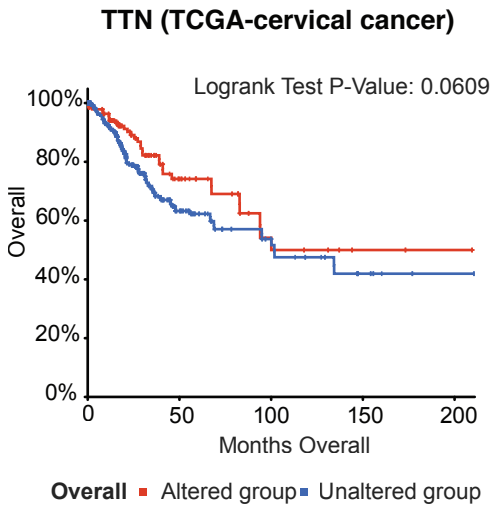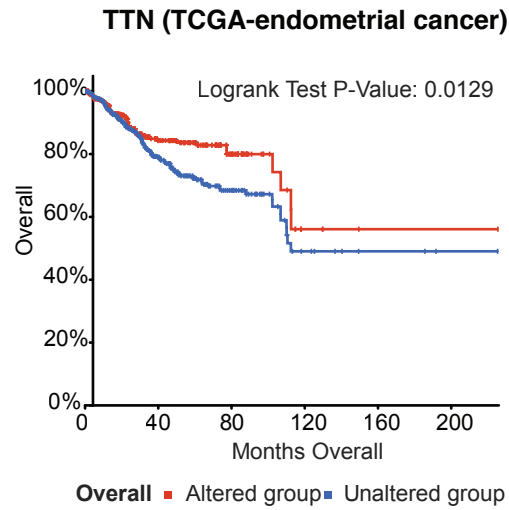

B

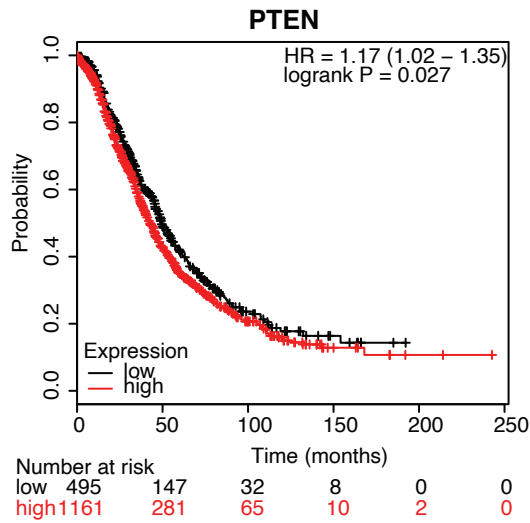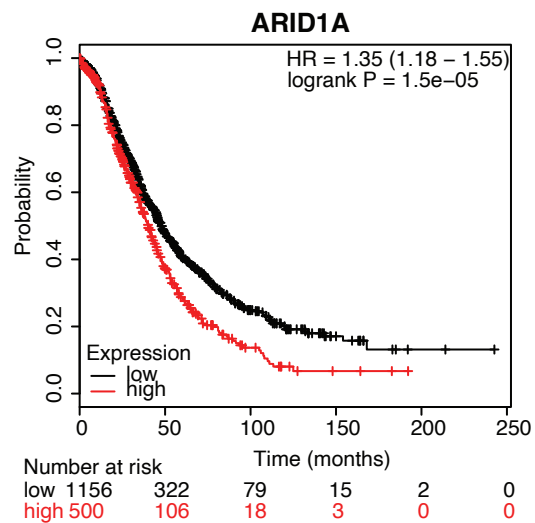

C

| Gene   | Driver/random mutation status                               |
|--------|-------------------------------------------------------------|
| TP53   | Putative driver                                             |
| PIK3CA | Putative driver                                             |
| PTEN   | Putative driver                                             |
| TTN    | Unknown significance and will require functional validation |
| ARID1A | Putative driver                                             |
| MUC16  | Unknown significance and will require functional validation |
| PIK3R1 | Putative driver                                             |
| KMT2D  | Putative driver                                             |
| CSMD3  | Unknown significance and will require functional validation |
| RYR2   | Unknown significance and will require functional validation |
| CTNNA1 | Putative driver                                             |
| FBXW7  | Putative driver                                             |
| USH2A  | Unknown significance and will require functional validation |
| KMT2C  | Putative driver                                             |
| SYNE1  | Unknown significance and will require functional validation |
| KRAS   | Putative driver                                             |
